# Supplementary material for: Long-Term Treatment Over 52 Weeks with Monthly Fremanezumab in Drug-Resistant Migraine: A Prospective Multicenter Cohort Study
Source: Springer Nature journal article supplement (doi:10.1007/s40263-023-01050-3), 2023-11-24
Supplement: MOESM1 [file 26353260]

## Supplementary data

*CNS drugs*

### Long term treatment over 52 weeks with monthly fremanezumab in drug resistant migraine: a prospective, multicenter study

Valeria Caponnetto<sup>1</sup>, Antonio Russo<sup>2</sup>, Marcello Silvestro<sup>2</sup>, Alessandro Tessitore<sup>2</sup>, Roberto De Icco<sup>3,4</sup>, Gloria Vaghi<sup>3,4</sup>, Grazia Sances<sup>4</sup>, Cristina Tassorelli<sup>3,4</sup>, Carlo Baraldi<sup>5</sup>, Flavia Lo Castro<sup>5</sup>, Simona Guerzoni<sup>5</sup>, Maria Pia Prudenzano<sup>6</sup>, Adriana Fallacara<sup>6</sup>, Martino Gentile<sup>6</sup>, Raffaele Ornello<sup>1</sup>, Agnese Onofri<sup>1</sup>, Andrea Burgalassi<sup>7</sup>, Alberto Chiarugi<sup>7,8</sup>, Francesco De Cesaris<sup>7</sup>, Antonio Granato<sup>9</sup>, Alfonsina Casalena<sup>10</sup>, Marina De Tommaso<sup>11</sup>, Edoardo Mampreso<sup>12</sup>, Paola Merlo<sup>13</sup>, Gianluca Coppola<sup>14</sup>, Stefania Battistini<sup>15</sup>, Valentina Rebecchi<sup>16</sup>, Innocenzo Rainero<sup>17</sup>, Federica Nicoletta Sepe<sup>18</sup>, Giorgio Dalla Volta<sup>19</sup>, Simona Sacco<sup>1</sup>, Pierangelo Geppetti<sup>7,8</sup>, Luigi Francesco Iannone<sup>7\*</sup>, on behalf of the Italian Headache Registry (RICE) Study Group.

<sup>1</sup>Department of Biotechnological and Applied Clinical Sciences, University of L'Aquila, L'Aquila, Italy.

<sup>2</sup>Headache Centre, Department of Advanced Medical and Surgical Sciences, University of Campania "Luigi Vanvitelli", Naples, Italy.

<sup>3</sup>Department of Brain and Behavioral Sciences, University of Pavia, Pavia, Italy.

<sup>4</sup>Headache Science & Neurorehabilitation Center, IRCCS Mondino Foundation, Pavia, Italy.

<sup>5</sup>Department of Specialist Medicines, Digital and Predictive Medicine, Pharmacology and Clinical Metabolic Toxicology-Headache Center and Drug Abuse, Laboratory of Clinical Pharmacology and Pharmacogenomics, AOU Policlinico di Modena, Modena, Italy.

<sup>6</sup>Headache Center, Department of Basic Medical Sciences, Neurosciences and Sense Organs, University of Bari, Bari, Italy.

<sup>7</sup>Headache Center and Clinical Pharmacology Unit, Careggi University Hospital, Florence, Italy.

<sup>8</sup>Section of Clinical Pharmacology and Oncology, Department of Health Sciences, University of Florence, Florence, Italy.

<sup>9</sup>Headache Centre, Clinical Unit of Neurology, School of Neurology, Department of Medicine, Surgery and Health Sciences, University Hospital and Health Services of Trieste, ASUGI, University of Trieste, Italy.

<sup>10</sup>Neurology Unit, "G. Mazzini" Hospital, Teramo, Italy.

<sup>11</sup>Department of Basic Medical Science, Neuroscience and Sense Organs, University of Bari Aldo Moro, Bari, Italy.

<sup>12</sup>Headache Centre, Neurology - Euganea, Padua Health Unit, Padua, Italy.

<sup>13</sup>Neurological Unit, Headache Centre, Humanitas Gavazzeni, Bergamo, Italy.

<sup>14</sup>Department of Medico-Surgical Sciences and Biotechnologies, Sapienza University of Rome Polo Pontino ICOT, Latina, Italy.

<sup>15</sup> Headache Center, Neurology and Clinical Neurophysiology Unit, Siena University Hospital Department of Medical, Surgical and Neurological Sciences, University of Siena, Siena, Italy.

<sup>16</sup> Neurology and Stroke Unit, ASST Sette Laghi, Varese, Italy.

<sup>17</sup>Headache Center, Department of Neuroscience "Rita Levi Montalcini", University of Torino, Italy.

<sup>18</sup> Neurology Department, Azienda Ospedaliera Nazionale Santi Antonio e Biagio e Cesare Arrigo, Alessandria, Italy.

<sup>19</sup> U.O. Neurologia, Headache Center Istituto Clinico "Città di Brescia", Gruppo San Donato Brescia, Italy.

#### \*Author for correspondence:

Luigi Francesco Iannone

Department of Health Sciences

University of Florence, Viale Pieraccini 6, Florence, Italy

[Luigifrancesco.iannone@unifi.it](mailto:Luigifrancesco.iannone@unifi.it)

**Table S1.** Concomitant and prior preventive treatments.

|                                                       | <b>Overall population<br/>(n =83)</b> | <b>HFEM<br/>(n=16)</b> | <b>CM<br/>(n=67)</b>   |
|-------------------------------------------------------|---------------------------------------|------------------------|------------------------|
| Patients with concomitant preventive treatment, n (%) | 27 (32.5)                             | 4 (25.0)               | 23 (34.3)              |
| Concomitant preventive treatment, mean ± SD           | 1.3±0.6                               | 1.5±0.5                | 1.2±0.6                |
| Prior preventive classes failures, mean ± SD          | 4.0±1.4                               | 3.5±1.1                | 4.1±1.5                |
| Prior preventive classes non-tolerated, mean ± SD     | 0.3±0.6                               | 0.3±0.7                | 0.2±0.5                |
| <b>Prior preventive class failures</b>                |                                       |                        |                        |
| <3 classes                                            | 12 (14.4)                             | 3 (18.8)               | 9 (13.5)               |
| ≥3 classes                                            | 71 (85.6)                             | 13 (81.5)              | 58 (86.5)              |
| ≥4 classes                                            | 54 (69.6)                             | 8 (50.0)               | 41 (61.1)              |
| ≥5 classes                                            | 32 (38.6)                             | 3 (18.7)               | 29 (43.2)              |
| ≥6 classes                                            | 13 (15.7)                             | 1 (6.2)                | 12 (17.9)              |
| ≥7 classes                                            | 2 (2.4)                               | 0                      | 2 (2.9)                |
| <b>Drug Classes</b>                                   |                                       |                        |                        |
| Beta-blockers                                         | 64 (78.1)                             | 11 (68.8)              | 53 (80.3)              |
| Tricyclic antidepressant                              | 74 (89.2)                             | 15 (93.8)              | 59 (88.1)              |
| Calcium channel blockers                              | 53 (63.9)                             | 13 (81.3)              | 40 (59.7)              |
| Antiseizure medications                               | 65 (78.3)                             | 11 (68.8)              | 54 (80.6)              |
| SSRIs/SNRIs                                           | 15 (18.1)/<br>8 (9.6)                 | 3 (18.8)/<br>1 (6.3)   | 12 (17.9)/<br>7 (10.4) |
| OnabotulinumtoxinA                                    | 35 (42.2)                             | 2 (12.5)               | 33 (49.3)              |
| Angiotensin receptor antagonists                      | 18 (21.7)                             | 1 (6.3)                | 17 (25.4)              |

Abbreviations: CM, chronic migraine; HFEM, high frequency episodic migraine; SD, standard deviation; SSRI, selective serotonin reuptake inhibitors; SNRI, serotonin-norepinephrine reuptake inhibitor. Percentages are expressed on column total.

**Table S2.** Adverse events reported through 12 months of follow-up.

|                                            | <b>Overall<br/>population<br/>(n =83)</b> | <b>HFEM<br/>(n=16)</b> | <b>CM<br/>(n=67)</b> |
|--------------------------------------------|-------------------------------------------|------------------------|----------------------|
| Patients reporting at least one AE, n (%)  | 8 (9.6)                                   | 2 (12.5)               | 6 (8.9)              |
| Overall AEs rate, n (%)                    | 10 (12.0)                                 | 3 (18.7)               | 7 (10.4)             |
| AEs leading to drug discontinuation, n (%) | 1 (1.2)                                   | 1 (6.2)                | -                    |
| <b>AEs reported</b>                        |                                           |                        |                      |
| Constipation, n (%)                        | 6 (7.2)                                   | 2 (12.5)               | 4 (5.9)              |
| Injection site reaction, n (%)             | 3 (3.6)                                   | 1 (6.2) <sup>a</sup>   | 2 (2.9)              |
| Effluvium, n (%)                           | 1 (1.2)                                   | -                      | 1 (1.4)              |

*Abbreviations: AE, adverse event; CM, chronic migraine; HFEM, high frequency episodic migraine. Percentages are expressed on column total. HFEM and CM are part of the overall population. <sup>a</sup>leading to discontinuation.*

**Table S3.** Changes in migraine-related variables during fremanezumab treatment in the overall, HFEM and CM populations (LOCF).

|                                    | Median (IQR) |  | Median difference (IQR) |                  |                  |
|------------------------------------|--------------|--|-------------------------|------------------|------------------|
|                                    | Baseline     |  | 3 months                | 6 months         | 12 months        |
| <b>Overall population (n=83)</b>   |              |  |                         |                  |                  |
| <b>Monthly headache days</b>       | 20.0 (15.0)  |  | -9.2 (12.0)             | -9.0 (14.0)      | -9.0 (16.0)      |
| <i>p value</i>                     | -            |  | <b>&lt;0.001</b>        | <b>&lt;0.001</b> | <b>&lt;0.001</b> |
| <b>Analgesic medication days</b>   | 15.0 (18.0)  |  | -9.0 (11.0)             | -9.0 (12.0)      | -9.0 (13.0)      |
| <i>p value</i>                     | -            |  | <b>&lt;0.001</b>        | <b>&lt;0.001</b> | <b>&lt;0.001</b> |
| <b>Analgesic medication number</b> | 20.0 (20.0)  |  | -10.0 (18.0)            | -11.0 (12.0)     | -12.0 (17.0)     |
| <i>p value</i>                     | -            |  | <b>&lt;0.001</b>        | <b>&lt;0.001</b> | <b>&lt;0.001</b> |
| <b>MIDAS score</b>                 | 64.0 (60.0)  |  | -35.0 (49.0)            | -35.0 (54.0)     | -35.0 (54.0)     |
| <i>p value</i>                     | -            |  | <b>&lt;0.001</b>        | <b>&lt;0.001</b> | <b>&lt;0.001</b> |
| <b>HIT-6 score</b>                 | 67.0 (7.0)   |  | -10.0 (15.0)            | -12.0 (16.0)     | -12.0 (17.0)     |
| <i>p value</i>                     | -            |  | <b>&lt;0.001</b>        | <b>&lt;0.001</b> | <b>&lt;0.001</b> |
| <b>HFEM (n=16)</b>                 |              |  |                         |                  |                  |
| <b>Monthly headache days</b>       | 10.0 (2.0)   |  | -5.0 (5.2)              | -6.0 (4.0)       | -6.0 (5.2)       |
| <i>p value</i>                     | -            |  | <b>0.001</b>            | <b>0.001</b>     | <b>0.001</b>     |
| <b>Analgesic medication days</b>   | 9.0 (2.0)    |  | -7.0 (6.0)              | -6.5 (6.5)       | -5.0 (6.0)       |
| <i>p value</i>                     | -            |  | <b>0.005</b>            | <b>0.004</b>     | <b>0.004</b>     |
| <b>Analgesic medication number</b> | 10.0 (2.0)   |  | -6.0 (7.5)              | -7.5 (8.0)       | -6.0 (7.5)       |
| <i>p value</i>                     | -            |  | <b>0.007</b>            | <b>0.005</b>     | <b>0.006</b>     |
| <b>MIDAS score</b>                 | 30.5 (31)    |  | -18.0 (20.5)            | -18.0 (35.2)     | -18.0 (29.7)     |
| <i>p value</i>                     | -            |  | <b>0.003</b>            | <b>0.002</b>     | <b>0.002</b>     |
| <b>HIT-6 score</b>                 | 67.0 (6.0)   |  | -10.0 (13.2)            | -20.0 (16.0)     | -15.0 (19.2)     |
| <i>p value</i>                     | -            |  | <b>0.001</b>            | <b>&lt;0.001</b> | <b>&lt;0.001</b> |
| <b>CM (n=67)</b>                   |              |  |                         |                  |                  |
| <b>Monthly headache days</b>       | 25.0 (14.0)  |  | -11.0 (14.0)            | -11.0 (17.0)     | -11.0 (18.0)     |
| <i>p value</i>                     | -            |  | <b>&lt;0.001</b>        | <b>&lt;0.001</b> | <b>&lt;0.001</b> |
| <b>Analgesic medication days</b>   | 20.0 (18.0)  |  | -10.0 (12.0)            | -10.0 (13.0)     | -10.0 (14.0)     |
| <i>p value</i>                     | -            |  | <b>&lt;0.001</b>        | <b>&lt;0.001</b> | <b>&lt;0.001</b> |
| <b>Analgesic medication number</b> | 25.0 (18.0)  |  | -13.0 (21.0)            | -13.0 (14.0)     | -14.0 (17.0)     |
| <i>p value</i>                     | -            |  | <b>&lt;0.001</b>        | <b>&lt;0.001</b> | <b>&lt;0.001</b> |
| <b>MIDAS score</b>                 | 80.0 (65.0)  |  | -47.0 (60.0)            | -45.0 (57.0)     | -45.0 (53.0)     |
| <i>p value</i>                     | -            |  | <b>&lt;0.001</b>        | <b>&lt;0.001</b> | <b>&lt;0.001</b> |
| <b>HIT-6 score</b>                 | 67.0 (7.0)   |  | -10.0 (15.0)            | -11.0 (18.0)     | -12.0 (18.0)     |
| <i>p value</i>                     | -            |  | <b>&lt;0.001</b>        | <b>&lt;0.001</b> | <b>&lt;0.001</b> |

Abbreviations: CM, chronic migraine; HFEM, high frequency episodic migraine; IQR, interquartile range; LOCF, last observation carried forward; HIT-6, Headache Impact Test 6; MIDAS, Migraine Disability Assessment; SD, standard deviation. Baseline values are the same of observed data analysis but reported for data consistency. The changes are calculated using the Wilcoxon signed-rank test and expressed as median reduction [IQR]. All *p* values and reductions are vs baseline. Significant *p* values are reported in bold. IQR, interquartile range.

**Table S4.** Response rate during fremanezumab treatment in HFEM, CM and overall populations (LOCF).

|                                  | <b>3 months<br/>n (%)</b> | <b>6 months<br/>n (%)</b> | <b>12 months<br/>n (%)</b> |
|----------------------------------|---------------------------|---------------------------|----------------------------|
| <b>Overall population (n=83)</b> |                           |                           |                            |
| Response rate $\geq 30\%$        | 57 (68.7)                 | 60 (72.3)                 | 58 (69.9)                  |
| Response rate $\geq 50\%$        | 42 (50.6)                 | 51 (61.4)                 | 53 (63.8)                  |
| Response rate $\geq 75\%$        | 19 (22.9)                 | 26 (31.3)                 | 25 (30.1)                  |
| Response rate 100%               | 2 (2.4)                   | 4 (4.8)                   | 5 (6.0)                    |
| <b>HFEM (n=16)</b>               |                           |                           |                            |
| Response rate $\geq 30\%$        | 11 (68.7)                 | 13 (81.2)                 | 12 (75.0)                  |
| Response rate $\geq 50\%$        | 9 (56.3)                  | 10 (62.5)                 | 11 (68.7)                  |
| Response rate $\geq 75\%$        | 2 (25.0)                  | 6 (37.5)                  | 5 (31.3)                   |
| Response rate 100%               | 2 (12.5)                  | 2 (12.5)                  | 2 (12.5)                   |
| <b>CM (n=67)</b>                 |                           |                           |                            |
| Response rate $\geq 30\%$        | 46 (68.7)                 | 47 (70.1)                 | 46 (68.7)                  |
| Response rate $\geq 50\%$        | 33 (49.3)                 | 41 (61.2)                 | 42 (62.7)                  |
| Response rate $\geq 75\%$        | 15 (22.4)                 | 20 (29.9)                 | 20 (29.9)                  |
| Response rate 100%               | 0                         | 2 (3.0)                   | 3 (6.0)                    |

*Abbreviations: CM, chronic migraine; HFEM, high frequency episodic migraine; LOCF, last observation carried forward. Percentages are expressed on column total. HFEM and CM are part of the overall population. Response rate percentages are cumulative.*

**Table S5.** Univariable regressions with baseline selected variables for clinical response (defined as response rate  $\geq 50\%$  MHDs) at 3, 6 and 12 months.

| Univariable                 | 3 months |           |                | 6 months |           |                | 12 months |           |                |
|-----------------------------|----------|-----------|----------------|----------|-----------|----------------|-----------|-----------|----------------|
|                             | OR       | 95%CI     | <i>p</i> value | OR       | 95%CI     | <i>p</i> value | OR        | 95%CI     | <i>p</i> value |
| Age (years)                 | 1.00     | 0.97-1.03 | 0.92           | 1.00     | 0.97-1.03 | 0.63           | 1.00      | 0.97-1.03 | 0.99           |
| Sex, <i>female</i>          | 1.65     | 0.63-4.33 | 0.30           | 0.93     | 0.35-2.49 | 0.90           | 1.00      | 0.37-2.69 | 0.98           |
| Chronic migraine            | 0.75     | 0.25-2.26 | 0.61           | 0.94     | 0.30-2.91 | 0.92           | 0.71      | 0.22-2.30 | 0.57           |
| Migraine duration (years)   | 1.00     | 0.97-1.03 | 0.62           | 0.97     | 0.92-1.01 | 0.22           | 0.96      | 0.91-1.00 | 0.09           |
| Number of prior failures    | 0.81     | 0.61-1.06 | 0.13           | 0.92     | 0.70-1.21 | 0.55           | 0.86      | 0.65-1.14 | 0.29           |
| Medication overuse          | 1.62     | 0.63-4.14 | 0.30           | 1.25     | 0.48-3.23 | 0.63           | 1.35      | 0.52-3.50 | 0.52           |
| Monthly headache days       | 0.96     | 0.91-1.01 | 0.17           | 0.96     | 0.91-1.02 | 0.24           | 0.97      | 0.95-1.03 | 0.44           |
| Analgesic medication days   | 0.99     | 0.95-1.04 | 0.80           | 1.00     | 0.95-1.04 | 0.99           | 0.98      | 0.94-1.03 | 0.61           |
| Analgesic medication number | 0.99     | 0.98-1.01 | 0.70           | 0.98     | 0.96-1.00 | 0.09           | 0.98      | 0.96-1.00 | 0.07           |
| MIDAS score                 | 1.00     | 0.99-1.01 | 0.71           | 1.00     | 0.99-1.01 | 0.98           | 0.99      | 0.99-1.00 | 0.86           |
| HIT-6 score                 | 0.98     | 0.91-1.06 | 0.72           | 0.95     | 0.87-1.03 | 0.26           | 0.99      | 0.92-1.07 | 0.93           |

Abbreviations: CI confidence interval; CM, chronic migraine; HFEM, high frequency episodic migraine; HIT-6, Headache Impact Test 6; MHDs, monthly headache days; MIDAS, Migraine Disability Assessment; OR, odds-ratio. Patients that discontinued treatment have been considered as non-responders for logistic regressions. For categorical variables, sex male, episodic migraine and absence of medication overuse have been used as reference.
